# Supplementary material
Source: publisher site journal article supplement (https://www.dovepress.com/article/307113)
Supplement: Supplementary file 1 [file get_supplementary_file.php]

**Table 1S The SMILE for All the Imidazole Derivatives Discussed in the Review.**

| **SMILES** | |
| --- | --- |
| **C1** | CCOC(C1=C2NC(C3=CC=C(Cl)C=C3)=C(NC(C)(C)C)N2N=C1)=O |
| **C2** | O=C(C1=C(C(O[NH2+]CC2(C)CC3C(C4=C(CC3)C=C(C(C)C)C=C4)(C)CC2)=O)N(C)C=N1)O[NH2+]CC5(C)CCCC6(C)C5CCC7=C6C=CC(C(C)C)=C7 |
| **C3** | CNC(C1=CC=CC=C1NC2=NC(NC3=CC=C(C=C3)CN)=NC4=NC=CN24)=O |
| **C4** | CCCCCCCN1C(CCCC)=NC(Cl)=C1C2=NC3=CC=CC=C3N2 |
| **C5** | CC1=NC2=C(N1C3CCCC3)C=C(C(Cl)=C2)Cl |
| **C6** | BrC1=CC=C(NC2=C(C(C3=C(C2=O)N=C(N3)C)=O)Cl)C=C1 |
| **C7** | COC1=CC(N2C(N(C(C)=O)C=C2C3=CC=C(C=C3)Br)=O)=CC(OC)=C1OC |
| **C8** | O=C(C1=CC(OC)=C(OC)C(OC)=C1)C2=NC3=CC(Br)=CC=C3S2 |
| **C9** | CC(CC1N(/C(NC1=O)=N/C2=NNC(NN)=N2)C(C)=O)C |
| **C10** | C1(CC2=CC=CC=C2)=C(C3=CC(C4=C(N5C=CC=CC5=N4)CC6=CC=CC=C6)=CC=C3)N=C7C=CC=CN17 |
| **C11** | ClC1=C(Cl)C=CC=C1C(N2)=NC3=C2C4=C(C5=C3C=CC=N5)N=CC=C4 |
| **C12** | O=C1N(CCCN2CCOCC2)C=NC(C1=C3)=CC=C3C(C=C4)=CC5=C4N=C(NC(CC)=O)N5 |
| **C13** | O=S(NCCCNC1=CC(C2=C(C3=CC=CC(OC)=C3)N=C(C4=CC=CC=C4)N2)=CC=N1)(C5=CC=C(C(F)(F)F)C=C5)=O |
| **C14** | O=C(NCN1N=NC(CSC2=NC(C3=CC=CC=C3)=C(N2C4=CC=CC=C4)C5=CC=CC=C5)=C1)C6=CC=C(C=C6)C(O)=O |
| **C15** | CCCCCCCCC/C=C/CCCCCCCNC(C1=CNC(C2=CC=CC=C2)=N1)=O |
| **C16** | CC1CC(C2=C(NC3=C(C(C4=CC=CC=C34)=O)C2C5=NC=C([N+]([O-])=O)N5C)C1)=O |
| **C17** | O=C1N2C=CC=C2C(C(NCC3=CC=CC=C3)=O)N1C4=CC=C(Cl)C=C4 |
| **M18** | CC1=NC2=C(C=CC=C2)N1CC3=NN=C(O3)C4=CC=C(Cl)C=C4 |
| **M19** | ClC1=CC=C(NC(CCCC/C=C/CCC(O)CCCCCCC)=N2)C2=C1 |
| **M20** | ClC1=CC=C(NC(/C([H])=C/CCCCCCCCC)=N2)C2=C1 |
| **M21** | [H]/C(C1CCC(O1)[N+]([O-])=O)=N\NC(C2=C(C)N(CC3=CC=CC=C3)C=[N+]2[O-])=O |
| **M22** | O=S(C(C=C1)=CC=C1N(N=N2)C=C2CSC3=NC4=CC=CC=C4N3CC5=CN(C6=CC=C(S(=O)(NC7=NC(C)=CC(C)=N7)=O)C=C6)N=N5)(NC8=NC(C)=CC(C)=N8)=O |
| **M23** | CC1=C(C(C)=O)N(C2=CC=C(OC)C=C2)C(SCC(NC3=CC=C(OC(C4=CC=CS4)=O)C=C3)=O)=N1 |
| **M24** | COC1=CC=C(C=C1)C2=CN(C3=CC=CC=C3)C(C4=CC=C([N+]([O-])=O)C=C4)=N2 |
| **M25** | COC1=CC=C(C2=CN(C3=CC=CC=C3)C(C4=CC=C(OC)C=C4)=N2)C=C1 |
| **M26** | ClC1=CC(C2=CC=CC=C2)=C(C=C1)C3=CNC=C3C(C4=CC=C(C=C4)Cl)N5C=CN=C5 |
| **M27** | O=C(N1)/C(NC1=O)=C\C2=CC=NC=C2 |
| **M28** | [O-][N+](C1=CC=C2N=C(N(C2=C1)OC(OCC(C)C)=O)C(OCC)=O)=O |
| **M29** | OC(C(C(C)(C)C)=CC(C(C)(C)C)=C1)=C1C(O2)=NC3=C2C(C=CC=C4)=C4C5=C3C=CC=C5 |
| **I30** | C12=CC=CC=C1N=C(C3=NC(N4CCN(C5=CC=CC=C5)CC4)=CN=C3)N2 |
| **I31** | O=C(N)C1=C2C(NC(C3=CC=C(OC)C=C3)=N2)=CC=C1 |
| **I32** | CCCC1=NC2=CC(C(N/N=C/C3=C(Cl)C=C(Cl)C=C3)=O)=CC(C)=C2N1 |
| **I33** | FC1=CC=C(C=C1)C2=NC(CC(OC)=O)=C(N2CC=C)C3=CC=CC=C3 |
| **I34** | O[C@H]([C@@H]1[C@@H](CC2=CN(C)C=N2)COC1=O)C3=CC=CC=C3 |
| **I35** | COC1=CC=C(C2=CN(C3=CC=CC=C3)C(C4=CC=C(C=C4)[N+]([O-])=O)=N2)C=C1 |
| **I36** | COC1=CC=C(C2=CN(C3=CC=CC=C3)C(C4=C(O)C=CC=C4)=N2)C=C1 |
| **I37** | ClC1=CC(NCC2=NC3=CC=CC=C3N2)=CC=C1 |
| **I38** | O=C(N/N=C/C1=CC=C(C=C1[N+]([O-])=O)[N+]([O-])=O)C2=C(N=C(N2)CCC)C(O)(C)C |
| **I39** | CC1=CC=CC=C1NCC2=NC3=CC(OC)=CC=C3N2S(=O)(C4=CC=CC=C4)=O |
